# Supplementary material for: Adapting (4,4) Networks through Substituent Effects and Conformationally Flexible 3,2’:6’,3”-Terpyridines
Source: MDPI journal article supplement (doi:10.3390/molecules26216337), 2021-10-20

# checkCIF/PLATON report

Structure factors have been supplied for datablock(s) rod149c\_0m

THIS REPORT IS FOR GUIDANCE ONLY. IF USED AS PART OF A REVIEW PROCEDURE FOR PUBLICATION, IT SHOULD NOT REPLACE THE EXPERTISE OF AN EXPERIENCED CRYSTALLOGRAPHIC REFEREE.

No syntax errors found.      CIF dictionary      Interpreting this report

## Datablock: rod149c\_0m

---

|                 |                                          |                                          |              |
|-----------------|------------------------------------------|------------------------------------------|--------------|
| Bond precision: | C-C = 0.0206 A                           | Wavelength=1.54178                       |              |
| Cell:           | a=25.8136(8)                             | b=25.8136(8)                             | c=18.8776(6) |
|                 | alpha=90                                 | beta=90                                  | gamma=90     |
| Temperature:    | 150 K                                    |                                          |              |
|                 | Calculated                               | Reported                                 |              |
| Volume          | 12578.9(9)                               | 12578.9(9)                               |              |
| Space group     | P 4/n c c                                | P 4/n c c                                |              |
| Hall group      | -P 4a 2ac                                | -P 4a 2ac                                |              |
| Moiety formula  | C56 H38 Co N8 S2, 4(C H Cl3) [+ solvent] | C56 H38 Co N8 S2, 4(C H Cl3), 0.3[CHCL3] |              |
| Sum formula     | C60 H42 Cl12 Co N8 S2 [+ solvent]        | C60.30 H42.30 Cl12.90 Co N8 S2           |              |
| Mr              | 1423.47                                  | 1459.27                                  |              |
| Dx, g cm-3      | 1.503                                    | 1.541                                    |              |
| Z               | 8                                        | 8                                        |              |
| Mu (mm-1)       | 7.824                                    | 8.183                                    |              |
| F000            | 5768.0                                   | 5907.0                                   |              |
| F000'           | 5800.29                                  |                                          |              |
| h,k,lmax        | 31,31,23                                 | 30,30,23                                 |              |
| Nref            | 5976                                     | 5852                                     |              |
| Tmin,Tmax       | 0.243,0.441                              | 0.493,0.753                              |              |
| Tmin'           | 0.156                                    |                                          |              |

Correction method= # Reported T Limits: Tmin=0.493 Tmax=0.753  
AbsCorr = MULTI-SCAN

Data completeness= 0.979      Theta(max)= 70.091

R(reflections)= 0.1858( 5020)      wR2(reflections)= 0.4271( 5852)

S = 1.125      Npar= 318

---

The following ALERTS were generated. Each ALERT has the format

**test-name\_ALERT\_alert-type\_alert-level.**

Click on the hyperlinks for more details of the test.

---

### ● Alert level B

|                   |                                       |        |        |
|-------------------|---------------------------------------|--------|--------|
| PLAT082_ALERT_2_B | High R1 Value .....                   | 0.19   | Report |
| PLAT084_ALERT_3_B | High wR2 Value (i.e. > 0.25) .....    | 0.43   | Report |
| PLAT213_ALERT_2_B | Atom C13 has ADP max/min Ratio .....  | 4.8    | prolat |
| PLAT341_ALERT_3_B | Low Bond Precision on C-C Bonds ..... | 0.0206 | Ang.   |

---

### ● Alert level C

RINTA01\_ALERT\_3\_C The value of Rint is greater than 0.12  
Rint given 0.151

|                   |                                                  |        |        |
|-------------------|--------------------------------------------------|--------|--------|
| PLAT020_ALERT_3_C | The Value of Rint is Greater Than 0.12 .....     | 0.151  | Report |
| PLAT213_ALERT_2_C | Atom S1 has ADP max/min Ratio .....              | 3.1    | prolat |
| PLAT242_ALERT_2_C | Low 'MainMol' Ueq as Compared to Neighbors of    | C41    | Check  |
| PLAT244_ALERT_4_C | Low 'Solvent' Ueq as Compared to Neighbors of    | C39    | Check  |
| PLAT250_ALERT_2_C | Large U3/U1 Ratio for Average U(i,j) Tensor .... | 2.2    | Note   |
| PLAT906_ALERT_3_C | Large K Value in the Analysis of Variance .....  | 17.448 | Check  |
| PLAT906_ALERT_3_C | Large K Value in the Analysis of Variance .....  | 5.156  | Check  |
| PLAT906_ALERT_3_C | Large K Value in the Analysis of Variance .....  | 2.986  | Check  |
| PLAT911_ALERT_3_C | Missing FCF Refl Between Thmin & STh/L= 0.600    | 18     | Report |

---

### ● Alert level G

FORMU01\_ALERT\_2\_G There is a discrepancy between the atom counts in the  
\_chemical\_formula\_sum and the formula from the \_atom\_site\* data.  
Atom count from \_chemical\_formula\_sum: C60.3 H42.3 Cl12.9 Co1 N8 S2  
Atom count from the \_atom\_site data: C60 H42 Cl12 Co1 N8 S2

CELLZ01\_ALERT\_1\_G Difference between formula and atom\_site contents detected.  
CELLZ01\_ALERT\_1\_G ALERT: Large difference may be due to a  
symmetry error - see SYMMG tests  
From the CIF: \_cell\_formula\_units\_Z 8  
From the CIF: \_chemical\_formula\_sum C60.30 H42.30 Cl12.90 Co N8 S2  
TEST: Compare cell contents of formula and atom\_site data

| atom | Z*formula | cif sites | diff |
|------|-----------|-----------|------|
| C    | 482.40    | 480.00    | 2.40 |
| H    | 338.40    | 336.00    | 2.40 |
| Cl   | 103.20    | 96.00     | 7.20 |
| Co   | 8.00      | 8.00      | 0.00 |
| N    | 64.00     | 64.00     | 0.00 |
| S    | 16.00     | 16.00     | 0.00 |

|                   |                                                  |        |        |
|-------------------|--------------------------------------------------|--------|--------|
| PLAT004_ALERT_5_G | Polymeric Structure Found with Maximum Dimension | 2      | Info   |
| PLAT041_ALERT_1_G | Calc. and Reported SumFormula Strings Differ     | Please | Check  |
| PLAT051_ALERT_1_G | Mu(calc) and Mu(CIF) Ratio Differs from 1.0 by . | 4.38   | %      |
| PLAT068_ALERT_1_G | Reported F000 Differs from Calcd (or Missing)... | Please | Check  |
| PLAT083_ALERT_2_G | SHELXL Second Parameter in WGHT Unusually Large  | 437.53 | Why ?  |
| PLAT171_ALERT_4_G | The CIF-Embedded .res File Contains EADP Records | 2      | Report |
| PLAT300_ALERT_4_G | Atom Site Occupancy of Cl6 Constrained at        | 0.5    | Check  |
| PLAT300_ALERT_4_G | Atom Site Occupancy of Cl7 Constrained at        | 0.5    | Check  |
| PLAT300_ALERT_4_G | Atom Site Occupancy of Cl8 Constrained at        | 0.5    | Check  |
| PLAT300_ALERT_4_G | Atom Site Occupancy of Cl9 Constrained at        | 0.5    | Check  |
| PLAT300_ALERT_4_G | Atom Site Occupancy of C20 Constrained at        | 0.5    | Check  |
| PLAT300_ALERT_4_G | Atom Site Occupancy of C27 Constrained at        | 0.5    | Check  |
| PLAT300_ALERT_4_G | Atom Site Occupancy of C28 Constrained at        | 0.5    | Check  |
| PLAT300_ALERT_4_G | Atom Site Occupancy of C29 Constrained at        | 0.5    | Check  |
| PLAT300_ALERT_4_G | Atom Site Occupancy of C30 Constrained at        | 0.5    | Check  |
| PLAT300_ALERT_4_G | Atom Site Occupancy of C31 Constrained at        | 0.5    | Check  |

|                   |                                                  |                |       |       |
|-------------------|--------------------------------------------------|----------------|-------|-------|
| PLAT300_ALERT_4_G | Atom Site Occupancy of C32                       | Constrained at | 0.6   | Check |
| PLAT300_ALERT_4_G | Atom Site Occupancy of C33                       | Constrained at | 0.6   | Check |
| PLAT300_ALERT_4_G | Atom Site Occupancy of C34                       | Constrained at | 0.6   | Check |
| PLAT300_ALERT_4_G | Atom Site Occupancy of C35                       | Constrained at | 0.6   | Check |
| PLAT300_ALERT_4_G | Atom Site Occupancy of C36                       | Constrained at | 0.6   | Check |
| PLAT300_ALERT_4_G | Atom Site Occupancy of C37                       | Constrained at | 0.6   | Check |
| PLAT300_ALERT_4_G | Atom Site Occupancy of C21                       | Constrained at | 0.4   | Check |
| PLAT300_ALERT_4_G | Atom Site Occupancy of C22                       | Constrained at | 0.4   | Check |
| PLAT300_ALERT_4_G | Atom Site Occupancy of C23                       | Constrained at | 0.4   | Check |
| PLAT300_ALERT_4_G | Atom Site Occupancy of C24                       | Constrained at | 0.4   | Check |
| PLAT300_ALERT_4_G | Atom Site Occupancy of C25                       | Constrained at | 0.4   | Check |
| PLAT300_ALERT_4_G | Atom Site Occupancy of C26                       | Constrained at | 0.4   | Check |
| PLAT300_ALERT_4_G | Atom Site Occupancy of H16                       | Constrained at | 0.5   | Check |
| PLAT300_ALERT_4_G | Atom Site Occupancy of H17                       | Constrained at | 0.5   | Check |
| PLAT300_ALERT_4_G | Atom Site Occupancy of H19                       | Constrained at | 0.5   | Check |
| PLAT300_ALERT_4_G | Atom Site Occupancy of H20                       | Constrained at | 0.5   | Check |
| PLAT300_ALERT_4_G | Atom Site Occupancy of H27                       | Constrained at | 0.5   | Check |
| PLAT300_ALERT_4_G | Atom Site Occupancy of H28                       | Constrained at | 0.5   | Check |
| PLAT300_ALERT_4_G | Atom Site Occupancy of H30                       | Constrained at | 0.5   | Check |
| PLAT300_ALERT_4_G | Atom Site Occupancy of H31                       | Constrained at | 0.5   | Check |
| PLAT300_ALERT_4_G | Atom Site Occupancy of H33                       | Constrained at | 0.6   | Check |
| PLAT300_ALERT_4_G | Atom Site Occupancy of H34                       | Constrained at | 0.6   | Check |
| PLAT300_ALERT_4_G | Atom Site Occupancy of H35                       | Constrained at | 0.6   | Check |
| PLAT300_ALERT_4_G | Atom Site Occupancy of H36                       | Constrained at | 0.6   | Check |
| PLAT300_ALERT_4_G | Atom Site Occupancy of H37                       | Constrained at | 0.6   | Check |
| PLAT300_ALERT_4_G | Atom Site Occupancy of H22                       | Constrained at | 0.4   | Check |
| PLAT300_ALERT_4_G | Atom Site Occupancy of H23                       | Constrained at | 0.4   | Check |
| PLAT300_ALERT_4_G | Atom Site Occupancy of H24                       | Constrained at | 0.4   | Check |
| PLAT300_ALERT_4_G | Atom Site Occupancy of H25                       | Constrained at | 0.4   | Check |
| PLAT300_ALERT_4_G | Atom Site Occupancy of H26                       | Constrained at | 0.4   | Check |
| PLAT301_ALERT_3_G | Main Residue Disorder .....(Resd 1 )             |                | 33%   | Note  |
| PLAT335_ALERT_2_G | Check Large C6 Ring C-C Range C15 -C31           |                | 0.22  | Ang.  |
| PLAT410_ALERT_2_G | Short Intra H...H Contact H8 ..H27 .             |                | 1.74  | Ang.  |
|                   | x,y,z =                                          | 1_555          | Check |       |
| PLAT605_ALERT_4_G | Largest Solvent Accessible VOID in the Structure |                | 84    | A**3  |
| PLAT794_ALERT_5_G | Tentative Bond Valency for Co1 (II) .            |                | 1.94  | Info  |
| PLAT811_ALERT_5_G | No ADDSYM Analysis: Too Many Excluded Atoms .... |                | !     | Info  |
| PLAT912_ALERT_4_G | Missing # of FCF Reflections Above STh/L= 0.600  |                | 88    | Note  |
| PLAT955_ALERT_1_G | Reported (CIF) and Actual (FCF) Lmax Differ by . |                | 1     | Units |
| PLAT978_ALERT_2_G | Number C-C Bonds with Positive Residual Density. |                | 5     | Info  |

---

0 **ALERT level A** = Most likely a serious problem - resolve or explain  
 4 **ALERT level B** = A potentially serious problem, consider carefully  
 10 **ALERT level C** = Check. Ensure it is not caused by an omission or oversight  
 58 **ALERT level G** = General information/check it is not something unexpected

6 ALERT type 1 CIF construction/syntax error, inconsistent or missing data  
 10 ALERT type 2 Indicator that the structure model may be wrong or deficient  
 9 ALERT type 3 Indicator that the structure quality may be low  
 44 ALERT type 4 Improvement, methodology, query or suggestion  
 3 ALERT type 5 Informative message, check

---

It is advisable to attempt to resolve as many as possible of the alerts in all categories. Often the minor alerts point to easily fixed oversights, errors and omissions in your CIF or refinement strategy, so attention to these fine details can be worthwhile. In order to resolve some of the more serious problems it may be necessary to carry out additional measurements or structure refinements. However, the purpose of your study may justify the reported deviations and the more serious of these should normally be commented upon in the discussion or experimental section of a paper or in the "special\_details" fields of the CIF. checkCIF was carefully designed to identify outliers and unusual parameters, but every test has its limitations and alerts that are not important in a particular case may appear. Conversely, the absence of alerts does not guarantee there are no aspects of the results needing attention. It is up to the individual to critically assess their own results and, if necessary, seek expert advice.

### **Publication of your CIF in IUCr journals**

A basic structural check has been run on your CIF. These basic checks will be run on all CIFs submitted for publication in IUCr journals (*Acta Crystallographica*, *Journal of Applied Crystallography*, *Journal of Synchrotron Radiation*); however, if you intend to submit to *Acta Crystallographica Section C* or *E* or *IUCrData*, you should make sure that full publication checks are run on the final version of your CIF prior to submission.

### **Publication of your CIF in other journals**

Please refer to the *Notes for Authors* of the relevant journal for any special instructions relating to CIF submission.

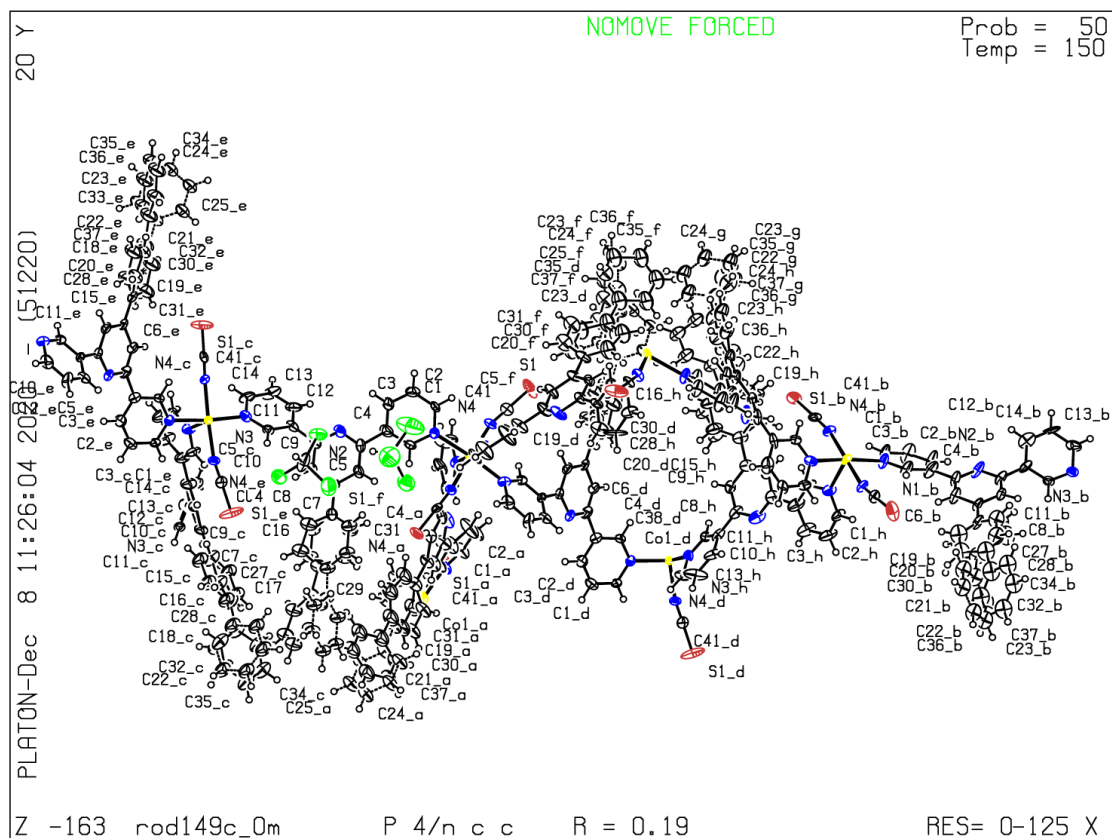

Supplement: s1 [file s1]
