# Supplementary material for: Adapting (4,4) Networks through Substituent Effects and Conformationally Flexible 3,2’:6’,3”-Terpyridines
Source: MDPI journal article supplement (doi:10.3390/molecules26216337), 2021-10-20

# checkCIF/PLATON report

Structure factors have been supplied for datablock(s) rod145\_0m

THIS REPORT IS FOR GUIDANCE ONLY. IF USED AS PART OF A REVIEW PROCEDURE FOR PUBLICATION, IT SHOULD NOT REPLACE THE EXPERTISE OF AN EXPERIENCED CRYSTALLOGRAPHIC REFEREE.

No syntax errors found.      CIF dictionary      Interpreting this report

## Datablock: rod145\_0m

---

|                 |                                          |                                          |
|-----------------|------------------------------------------|------------------------------------------|
| Bond precision: | C-C = 0.0089 A                           | Wavelength=1.54178                       |
| Cell:           | a=26.1874(12)                            | b=26.1874(12)      c=19.0189(10)         |
|                 | alpha=90                                 | beta=90      gamma=90                    |
| Temperature:    | 150 K                                    |                                          |
|                 | Calculated                               | Reported                                 |
| Volume          | 13042.8(14)                              | 13042.8(14)                              |
| Space group     | P 4/n c c                                | P 4/n c c                                |
| Hall group      | -P 4a 2ac                                | -P 4a 2ac                                |
| Moiety formula  | C58 H42 Co N8 S2, 4(C H Cl3) [+ solvent] | C58 H42 Co N8 S2, 4(C H Cl3), 0.5[CHCL3] |
| Sum formula     | C62 H46 Cl12 Co N8 S2 [+ solvent]        | C62.50 H46.50 Cl13.50 Co N8 S2           |
| Mr              | 1451.52                                  | 1511.20                                  |
| Dx, g cm-3      | 1.478                                    | 1.539                                    |
| Z               | 8                                        | 8                                        |
| Mu (mm-1)       | 7.557                                    | 8.134                                    |
| F000            | 5896.0                                   | 6128.0                                   |
| F000'           | 5928.54                                  |                                          |
| h,k,lmax        | 31,31,23                                 | 31,30,22                                 |
| Nref            | 6069                                     | 5933                                     |
| Tmin,Tmax       | 0.192,0.197                              | 0.611,0.753                              |
| Tmin'           | 0.123                                    |                                          |

Correction method= # Reported T Limits: Tmin=0.611 Tmax=0.753  
AbsCorr = MULTI-SCAN

Data completeness= 0.978      Theta(max)= 68.911

R(reflections)= 0.0949( 5227)      wR2(reflections)= 0.3016( 5933)

S = 1.075      Npar= 385

---

The following ALERTS were generated. Each ALERT has the format

**test-name\_ALERT\_alert-type\_alert-level.**

Click on the hyperlinks for more details of the test.

---

**Alert level B**

PLAT934\_ALERT\_3\_B Number of (Iobs-Icalc)/Sigma(W) > 10 Outliers .. 2 Check

---

**Alert level C**

DIFMX02\_ALERT\_1\_C The maximum difference density is > 0.1\*ZMAX\*0.75

The relevant atom site should be identified.

|                                                                    |        |        |
|--------------------------------------------------------------------|--------|--------|
| PLAT084_ALERT_3_C High wR2 Value (i.e. > 0.25) .....               | 0.30   | Report |
| PLAT097_ALERT_2_C Large Reported Max. (Positive) Residual Density  | 2.22   | eA-3   |
| PLAT244_ALERT_4_C Low 'Solvent' Ueq as Compared to Neighbors of    | C31    | Check  |
| PLAT341_ALERT_3_C Low Bond Precision on C-C Bonds .....            | 0.0089 | Ang.   |
| PLAT906_ALERT_3_C Large K Value in the Analysis of Variance .....  | 3.469  | Check  |
| PLAT911_ALERT_3_C Missing FCF Refl Between Thmin & STh/L= 0.600    | 12     | Report |
| PLAT918_ALERT_3_C Reflection(s) with I(obs) much Smaller I(calc) . | 7      | Check  |
| PLAT973_ALERT_2_C Check Calcd Positive Resid. Density on Col       | 1.28   | eA-3   |

---

**Alert level G**

FORMU01\_ALERT\_2\_G There is a discrepancy between the atom counts in the

\_chemical\_formula\_sum and the formula from the \_atom\_site\* data.

Atom count from \_chemical\_formula\_sum: C62.5 H46.5 Cl13.5 Co1 N8 S2

Atom count from the \_atom\_site data: C62 H46 Cl12 Co1 N8 S2

CELLZ01\_ALERT\_1\_G Difference between formula and atom\_site contents detected.

CELLZ01\_ALERT\_1\_G ALERT: Large difference may be due to a

symmetry error - see SYMMG tests

From the CIF: \_cell\_formula\_units\_Z 8

From the CIF: \_chemical\_formula\_sum C62.50 H46.50 Cl13.50 Co N8 S2

TEST: Compare cell contents of formula and atom\_site data

| atom | Z*formula | cif sites | diff  |
|------|-----------|-----------|-------|
| C    | 500.00    | 496.00    | 4.00  |
| H    | 372.00    | 368.00    | 4.00  |
| Cl   | 108.00    | 96.00     | 12.00 |
| Co   | 8.00      | 8.00      | 0.00  |
| N    | 64.00     | 64.00     | 0.00  |
| S    | 16.00     | 16.00     | 0.00  |

|                                                                    |        |        |
|--------------------------------------------------------------------|--------|--------|
| PLAT004_ALERT_5_G Polymeric Structure Found with Maximum Dimension | 2      | Info   |
| PLAT041_ALERT_1_G Calc. and Reported SumFormula Strings Differ     | Please | Check  |
| PLAT051_ALERT_1_G Mu(calc) and Mu(CIF) Ratio Differs from 1.0 by . | 7.09   | %      |
| PLAT068_ALERT_1_G Reported F000 Differs from Calcd (or Missing)... | Please | Check  |
| PLAT072_ALERT_2_G SHELXL First Parameter in WGHT Unusually Large   | 0.18   | Report |
| PLAT083_ALERT_2_G SHELXL Second Parameter in WGHT Unusually Large  | 70.81  | Why ?  |
| PLAT605_ALERT_4_G Largest Solvent Accessible VOID in the Structure | 165    | A**3   |
| PLAT794_ALERT_5_G Tentative Bond Valency for Co1 (II) .            | 1.88   | Info   |
| PLAT868_ALERT_4_G ALERTS Due to the Use of _smtbx_masks Suppressed | !      | Info   |
| PLAT912_ALERT_4_G Missing # of FCF Reflections Above STh/L= 0.600  | 125    | Note   |
| PLAT978_ALERT_2_G Number C-C Bonds with Positive Residual Density. | 5      | Info   |

---

0 **ALERT level A** = Most likely a serious problem - resolve or explain

1 **ALERT level B** = A potentially serious problem, consider carefully

9 **ALERT level C** = Check. Ensure it is not caused by an omission or oversight

14 **ALERT level G** = General information/check it is not something unexpected

6 **ALERT type 1** CIF construction/syntax error, inconsistent or missing data

6 ALERT type 2 Indicator that the structure model may be wrong or deficient  
6 ALERT type 3 Indicator that the structure quality may be low  
4 ALERT type 4 Improvement, methodology, query or suggestion  
2 ALERT type 5 Informative message, check

---

It is advisable to attempt to resolve as many as possible of the alerts in all categories. Often the minor alerts point to easily fixed oversights, errors and omissions in your CIF or refinement strategy, so attention to these fine details can be worthwhile. In order to resolve some of the more serious problems it may be necessary to carry out additional measurements or structure refinements. However, the purpose of your study may justify the reported deviations and the more serious of these should normally be commented upon in the discussion or experimental section of a paper or in the "special\_details" fields of the CIF. checkCIF was carefully designed to identify outliers and unusual parameters, but every test has its limitations and alerts that are not important in a particular case may appear. Conversely, the absence of alerts does not guarantee there are no aspects of the results needing attention. It is up to the individual to critically assess their own results and, if necessary, seek expert advice.

### **Publication of your CIF in IUCr journals**

A basic structural check has been run on your CIF. These basic checks will be run on all CIFs submitted for publication in IUCr journals (*Acta Crystallographica*, *Journal of Applied Crystallography*, *Journal of Synchrotron Radiation*); however, if you intend to submit to *Acta Crystallographica Section C* or *E* or *IUCrData*, you should make sure that full publication checks are run on the final version of your CIF prior to submission.

### **Publication of your CIF in other journals**

Please refer to the *Notes for Authors* of the relevant journal for any special instructions relating to CIF submission.

---

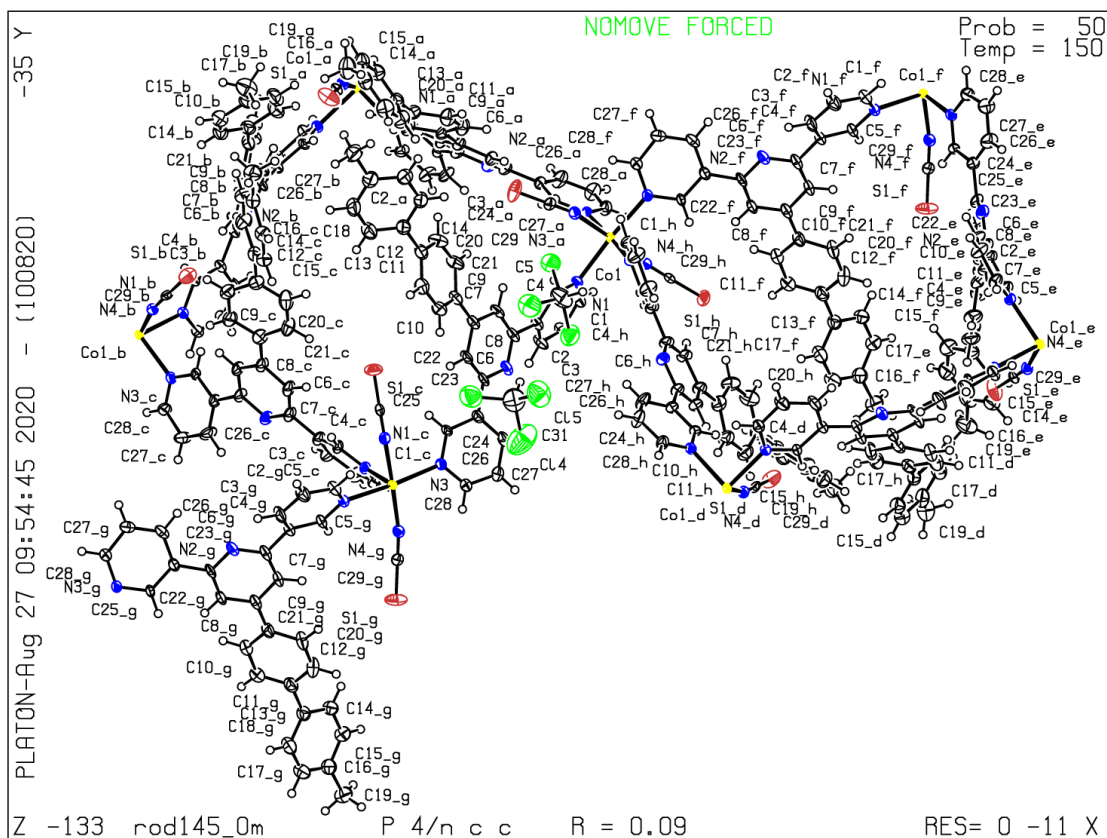

Supplement: s1 [file s1]
