# Supplementary material for: Adapting (4,4) Networks through Substituent Effects and Conformationally Flexible 3,2’:6’,3”-Terpyridines
Source: MDPI journal article supplement (doi:10.3390/molecules26216337), 2021-10-20
Supplement: s1 [file s1]

Supporting Information to accompany:

**Adapting (4,4) Networks Through Substituent effects and Conformationally Flexible 3,2':6',3''-Terpyridines**

Dalila Rocco, Alessandro Prescimone, Edwin C. Constable and Catherine E. Housecroft\*

Department of Chemistry, University of Basel, Mattenstrasse 24a, BPR 1096, 4058 Basel, Switzerland

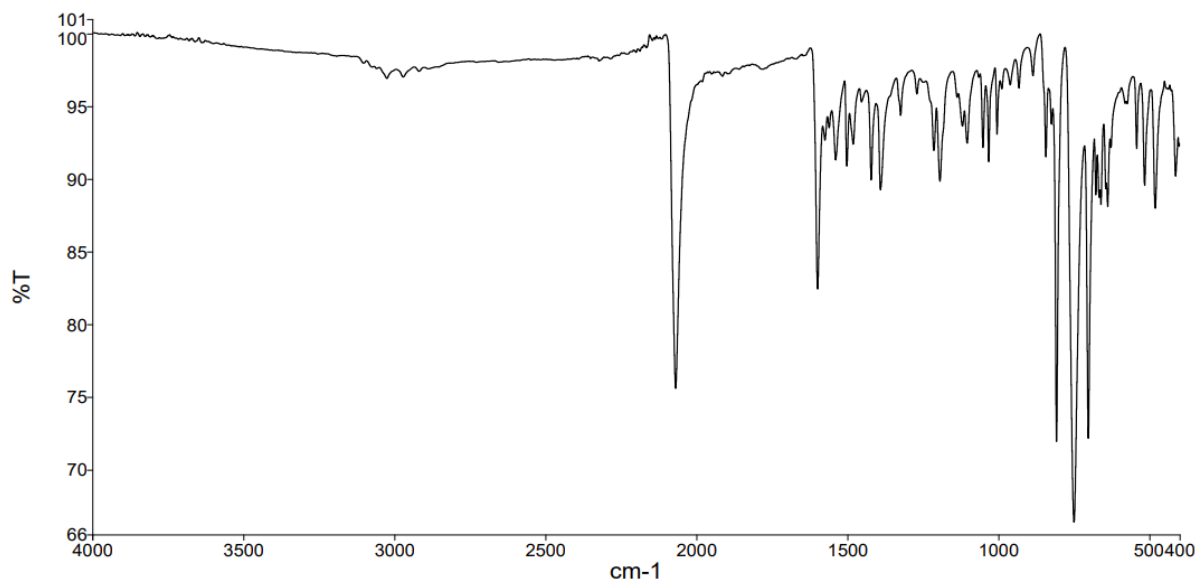

Fig. S1. Solid-state IR spectrum of  $[\text{Co}(\mathbf{1})_2(\text{NCS})_2]_n \cdot 4.5n\text{CHCl}_3$

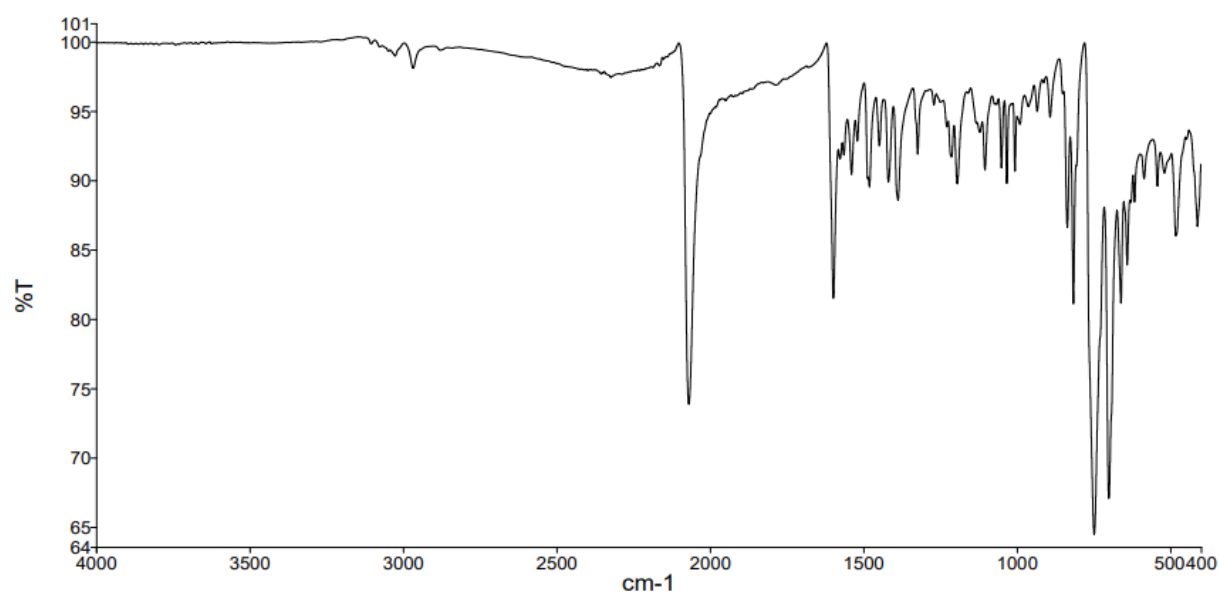

Fig. S2. Solid-state IR spectrum of  $[\text{Co}(\mathbf{2})_2(\text{NCS})_2]_n \cdot 4.3n\text{CHCl}_3$

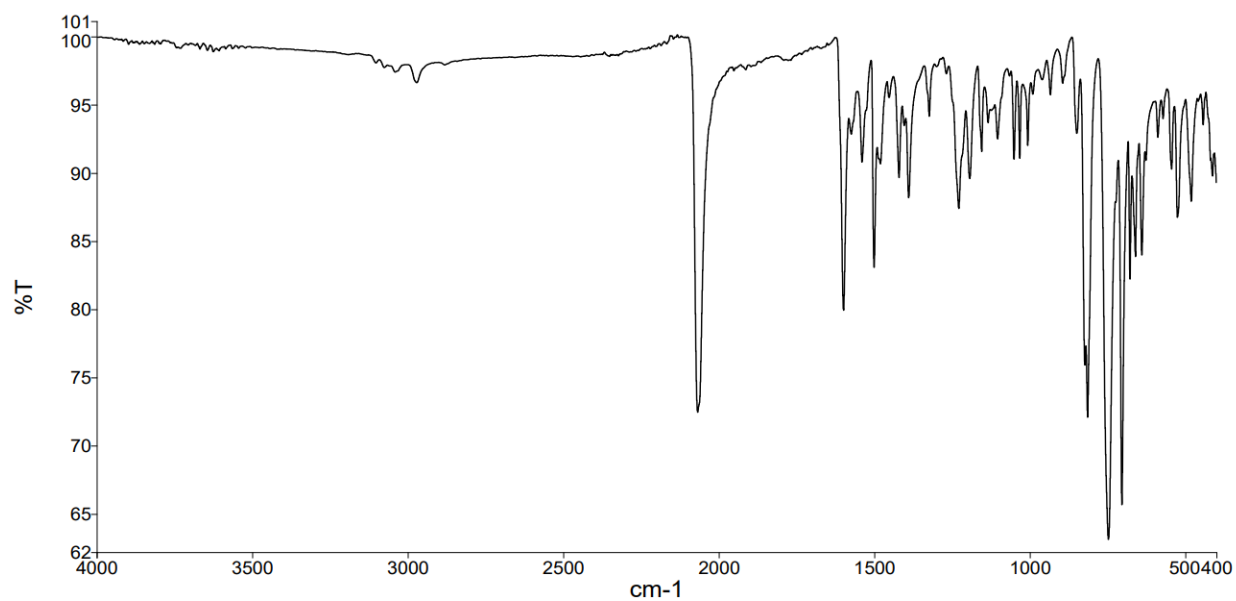

Fig. S3. Solid-state IR spectrum of  $[\text{Co}(\mathbf{3})_2(\text{NCS})_2]_n \cdot 4n\text{CHCl}_3$

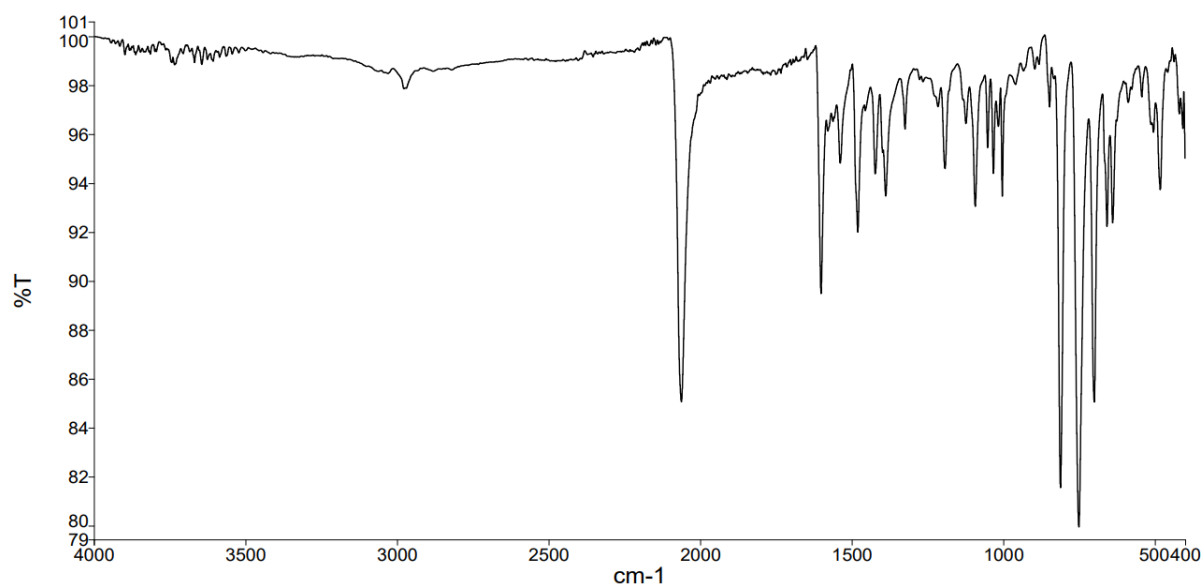

Fig. S4. Solid-state IR spectrum of  $[\text{Co}(\mathbf{4})_2(\text{NCS})_2]_n$

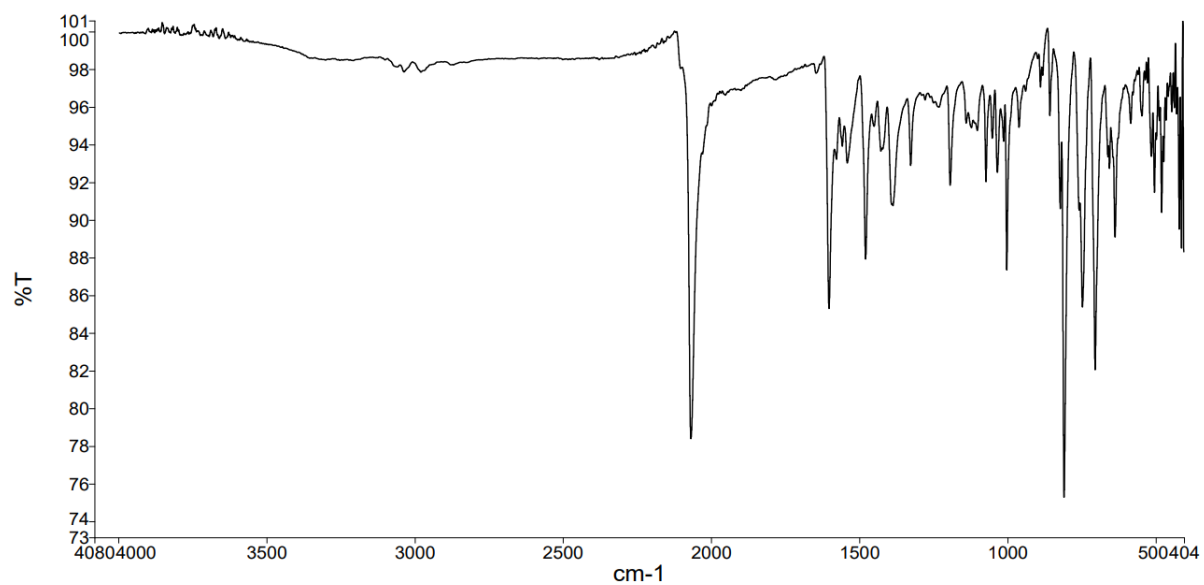

Fig. S5. Solid-state IR spectrum of  $[\text{Co}(\mathbf{5})_2(\text{NCS})_2]_n \cdot n\text{CHCl}_3$

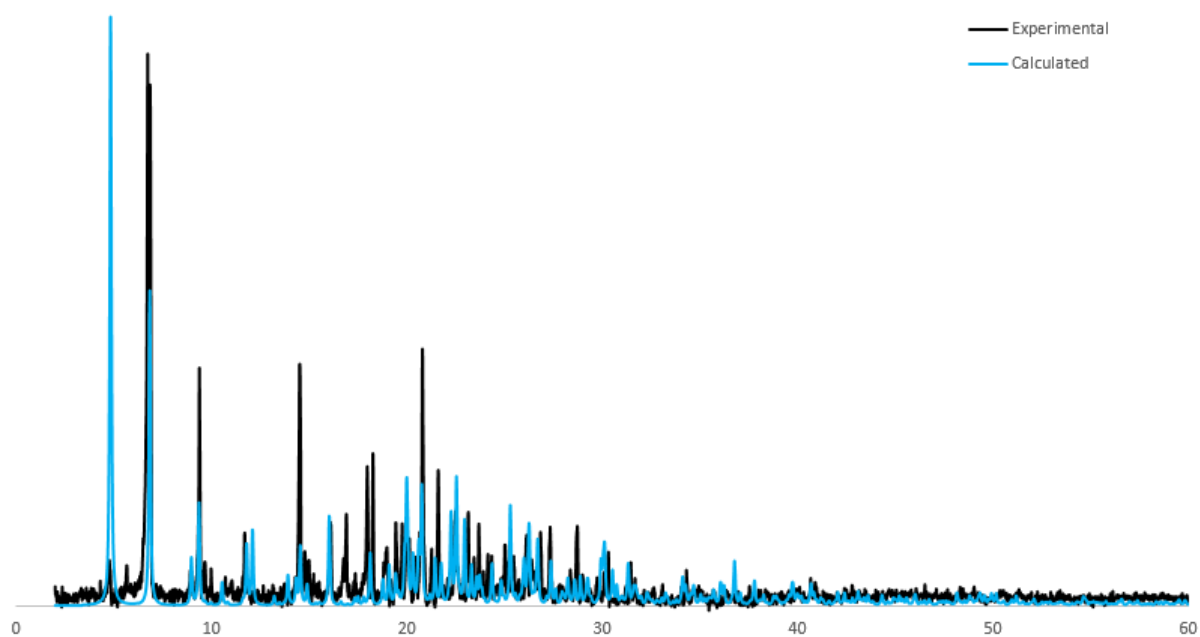

Fig. S6. Overlay of the experimental PXRD (298 K) for the bulk material and that predicted from the single crystal structure (150 K) of  $[\text{Co}(\mathbf{2})_2(\text{NCS})_2]_n \cdot 4.3n\text{CHCl}_3$ .

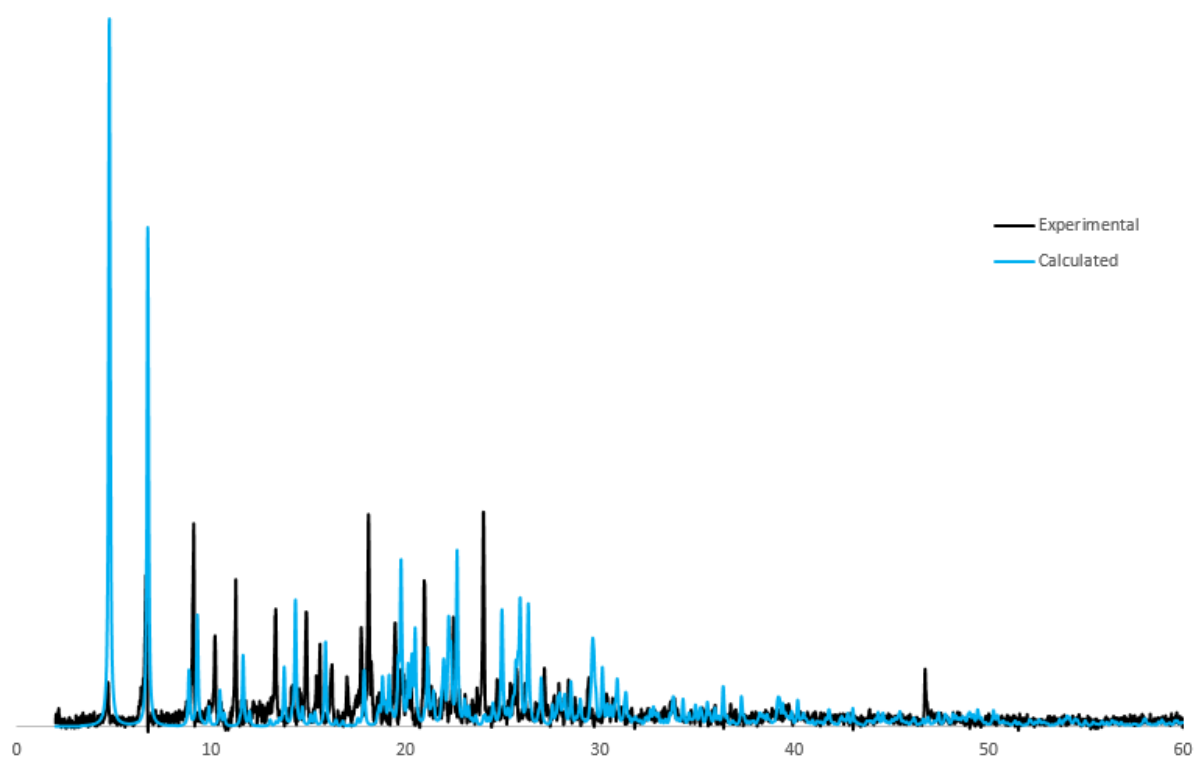

Fig. S7. Overlay of the experimental PXRD (298 K) for the bulk material and that predicted from the single crystal structure (150 K) of  $[\text{Co}(\mathbf{1})_2(\text{NCS})_2]_n \cdot 4.5n\text{CHCl}_3$ .

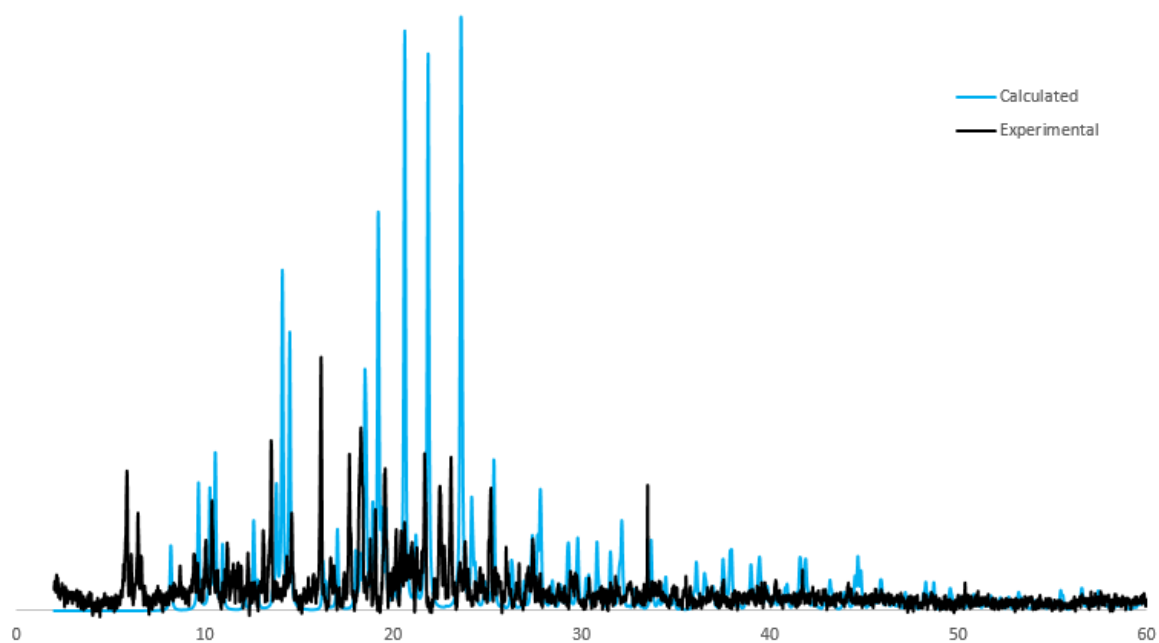

Fig. S8. Overlay of the experimental PXRD (298 K) for the bulk material and that predicted from the single crystal structure (150 K) of  $[\text{Co}(\mathbf{4})_2(\text{NCS})_2]_n$ .

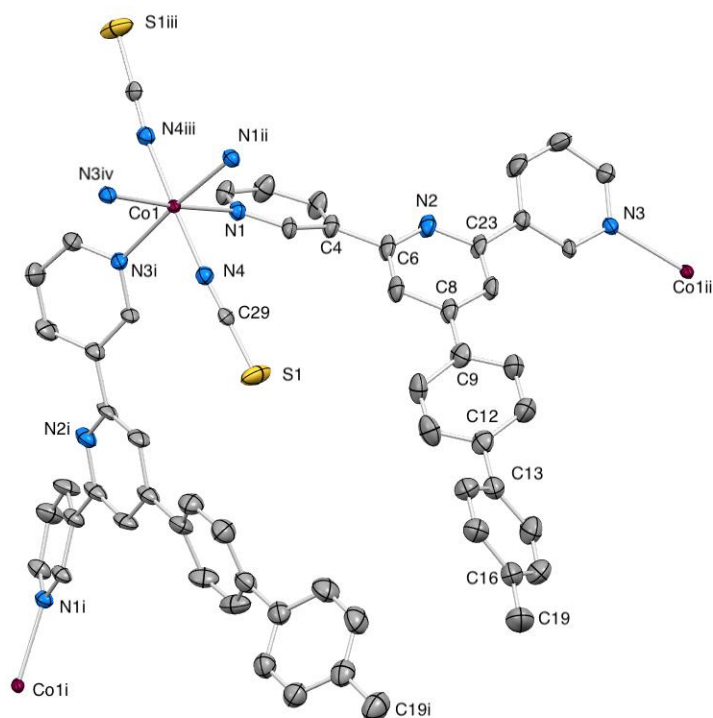

Fig. S9. Structure of the asymmetric unit in  $[\text{Co}(\mathbf{1})_2(\text{NCS})_2]_n \cdot 4.5n\text{CHCl}_3$  with symmetry related atoms. Symmetry codes: i =  $3/2 - y, x, z$ ; ii =  $y, 3/2 - x, z$ ; iii =  $1 - y, 1 - x, 1/2 - z$ ; iv =  $1 - x, -1/2 + y, 1/2 - z$ . H atoms and solvent molecules are omitted. Ellipsoids are plotted at 40% probability level.

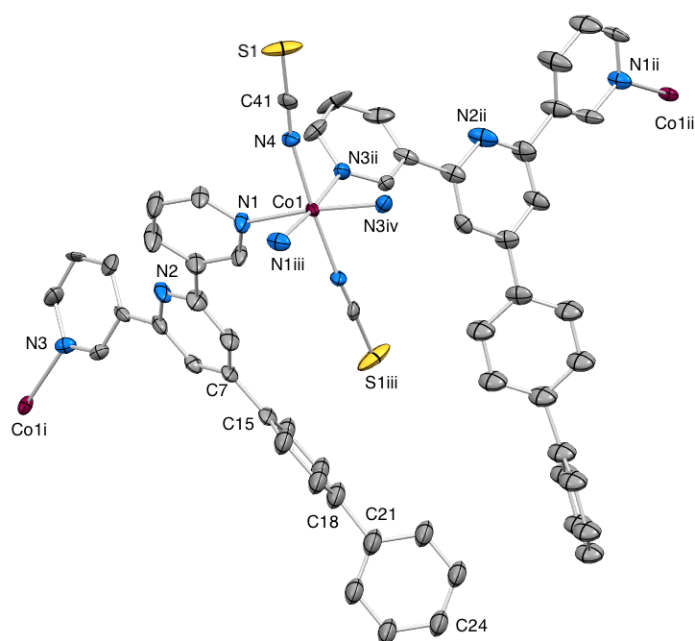

Fig. S10. Structure of the asymmetric unit in  $[\text{Co}(\mathbf{2})_2(\text{NCS})_2]_n \cdot 4.3n\text{CHCl}_3$  with symmetry related atoms. The biphenyl unit is disordered (see text) and only one position is shown. Symmetry codes: i =  $y, 1/2 - x, z$ ; ii =  $1/2 - y, x, z$ ; iii =  $-1/2 + y, 1/2 + x, 3/2 - z$ ; iv =  $-1/2 + x, 1 - y, 3/2 - z$ . H atoms and solvent molecules omitted. Ellipsoids are plotted at 40% probability level.

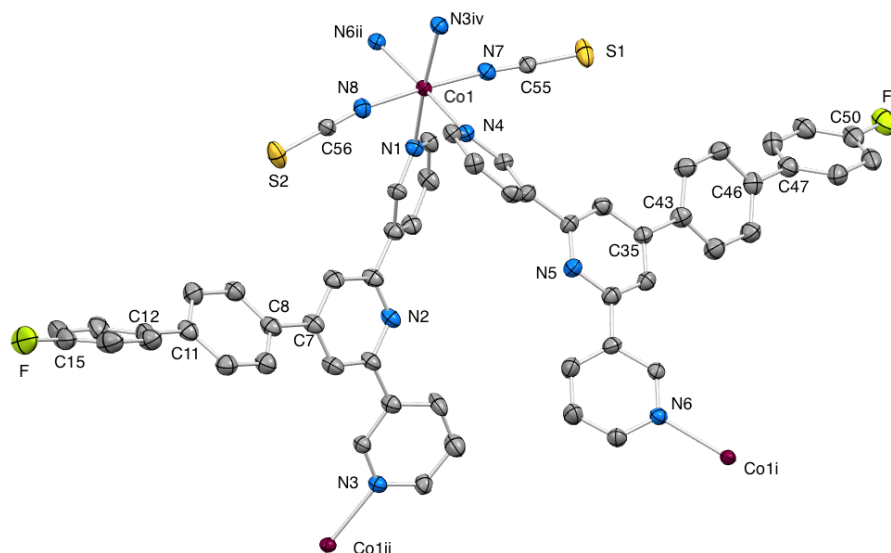

Fig. S11. Structure of the asymmetric unit in  $[\text{Co}(\mathbf{3})_2(\text{NCS})_2]_n \cdot 4n\text{CHCl}_3$  with symmetry related atoms. H atoms and solvent molecules omitted. Ellipsoids are plotted at 40% probability level. Symmetry codes: i =  $1-x, -1/2+y, 3/2-z$ ; ii =  $1/2+x, 1-y, 3/2-z$ ; iii =  $1-x, 1/2+y, 3/2-z$ ; iv =  $-1/2+x, 1-y, 3/2-z$ .

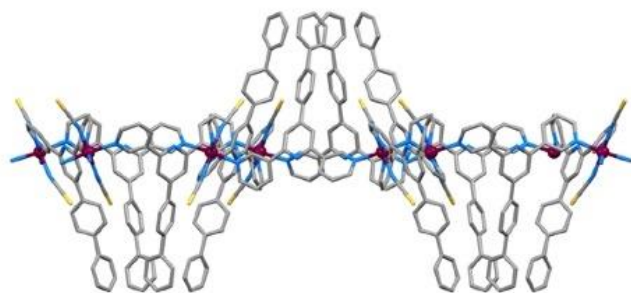

Fig. S12. Part of one 2D-sheet in  $[\text{Co}(\mathbf{2})_2(\text{NCS})_2]_n \cdot 4.3n\text{CHCl}_3$  showing cones above and below the plane containing the Co atoms. H atoms and solvnet molecules are omitted.

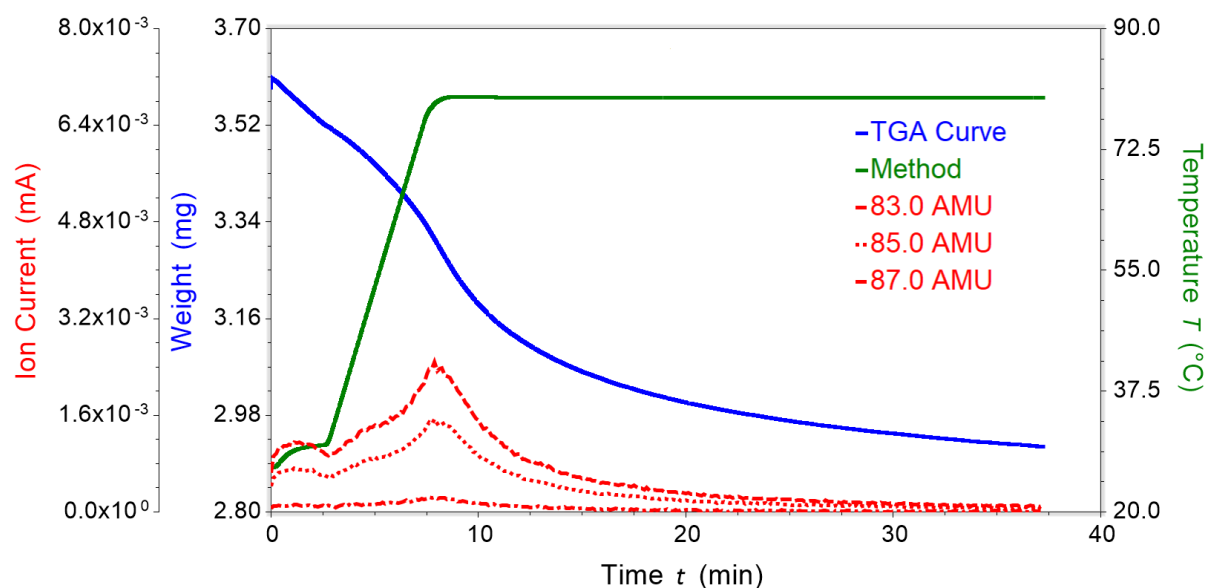

Fig. S13. TGA and mass spectrometric traces for the analysis of  $[\text{Co}(\mathbf{3})_2(\text{NCS})_2]_n \cdot 4n\text{CHCl}_3$  (cycle 2: after 24 hour exposure to  $\text{CHCl}_3$  vapor). Green: temperature vs. time; blue: weight of sample vs. time; red: mass detection for  $m/z$  83.0 (most intense peak), 85.0 and 87.0. The initial mass of sample was 3.60 mg and a weight loss of 0.68 mg corresponds to ca. 19%.

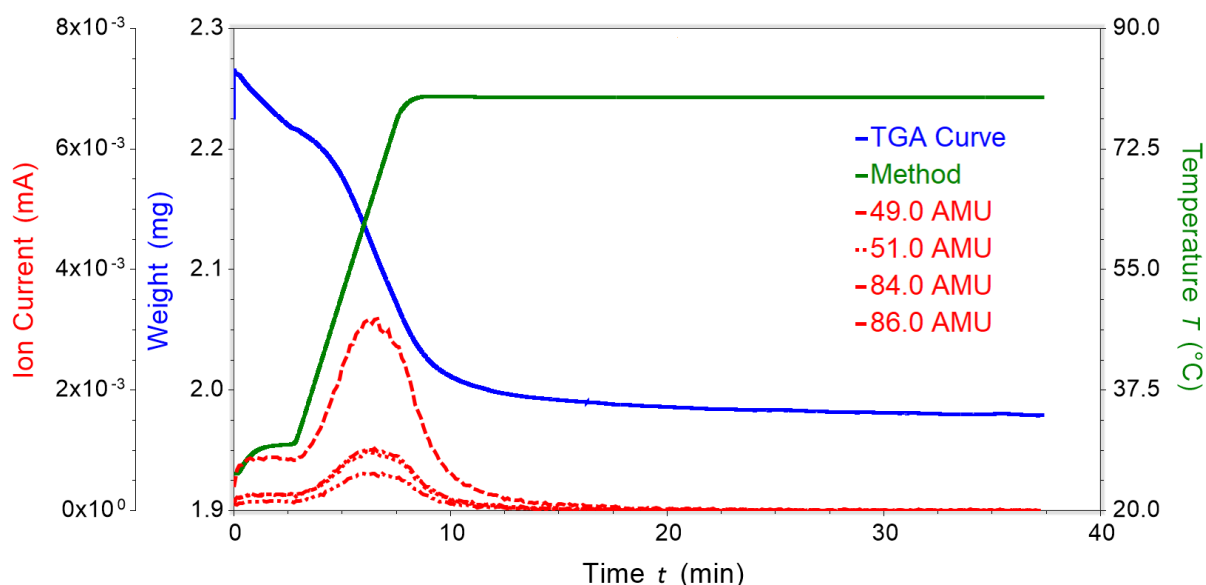

Fig. S14. TGA and mass spectrometric traces for the analysis of  $[\text{Co}(\mathbf{3})_2(\text{NCS})_2]_n \cdot 2n\text{CHCl}_3 \cdot 2n\text{CH}_2\text{Cl}_2$  (cycle 4: after 24 hours exposure to  $\text{CH}_2\text{Cl}_2$  vapor). Green: temperature vs. time; blue: weight of sample vs. time; red: mass detection for  $m/z$  49.0, 51.0, 84.0, 86.0. The initial mass of sample was 2.26 mg and a weight loss of 0.28 mg corresponds to ca. 12%.

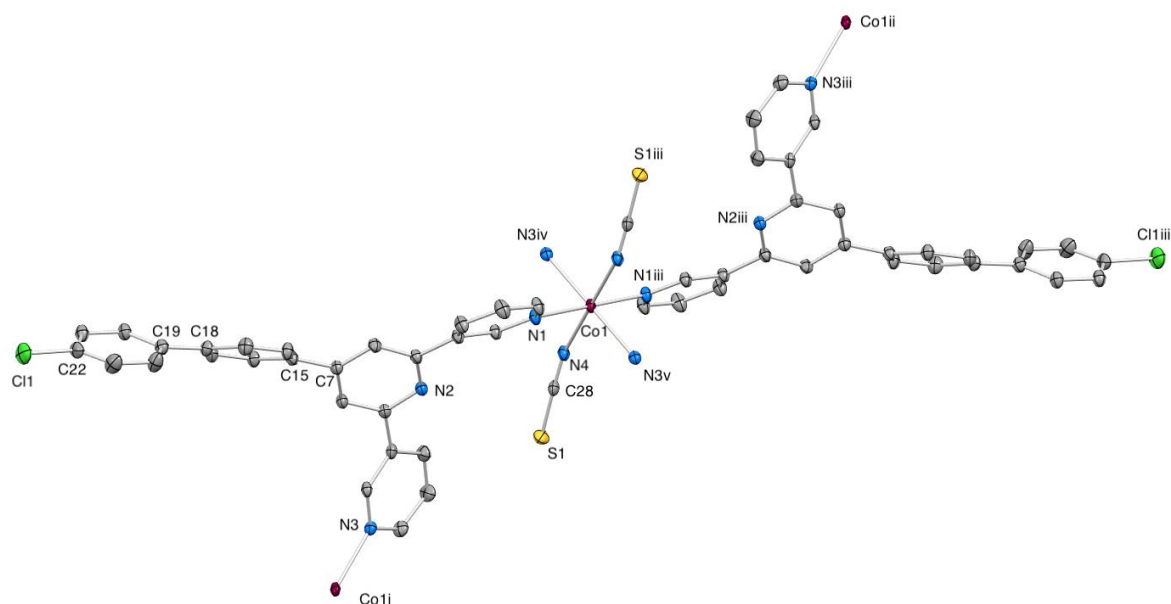

Fig. S15. Structure of the asymmetric unit in  $[\text{Co}(\mathbf{4})_2(\text{NCS})_2]_n$  with symmetry related atoms. H atoms and solvent molecules omitted. Ellipsoids are plotted at 40% probability level. Symmetry codes: i =  $1/2+x, 1/2+y, 3/2-z$ ; ii =  $-1/2-x, -1/2+y, 1/2-z$ ; iii =  $-x, -y, 1-z$ ; iv =  $-1/2+x, 1/2-y, -1/2+z$ ; v =  $1/2+x, -1/2+y, 3/2-z$ .

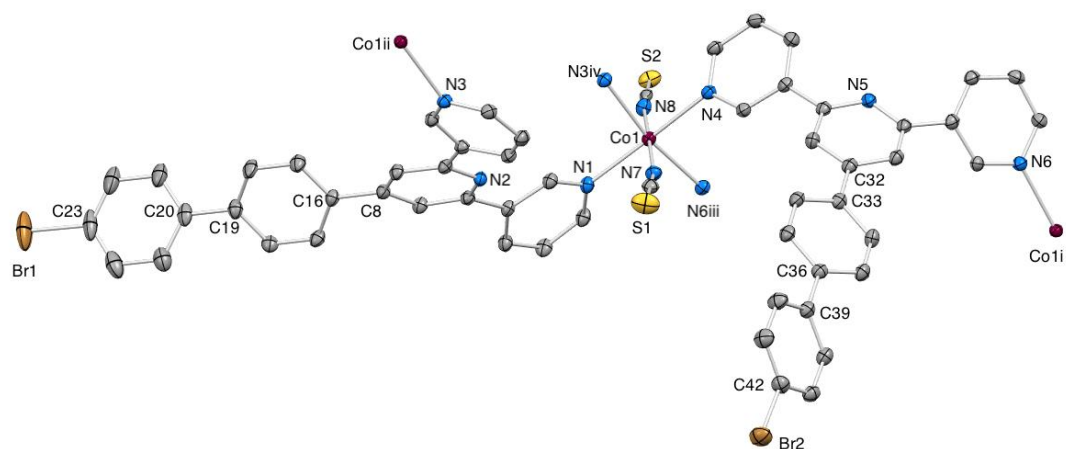

Fig. S16. Structure of the asymmetric unit in  $[\text{Co}(\mathbf{5})_2(\text{NCS})_2]_n \cdot n\text{CHCl}_3$  with symmetry related atoms. H atoms and solvent molecules omitted. Ellipsoids are plotted at 40% probability level. Symmetry codes: i =  $5/2-x, 1/2+y, 1/2-z$ ; ii =  $3/2-x, -1/2+y, 1/2-z$ ; iii =  $5/2-x, -1/2+y, 1/2-z$ ; iv =  $3/2-x, 1/2+y, 1/2-z$ .
